# Supplementary material for: The Sensorial and Chemical Changes in Beer Brewed with Yeast Genetically Modified to Release Polyfunctional Thiols from Malt and Hops
Source: MDPI journal article supplement (doi:10.3390/fermentation8080370), 2022-08-05
Supplement: s1 [file s1]

## Supplementary Materials

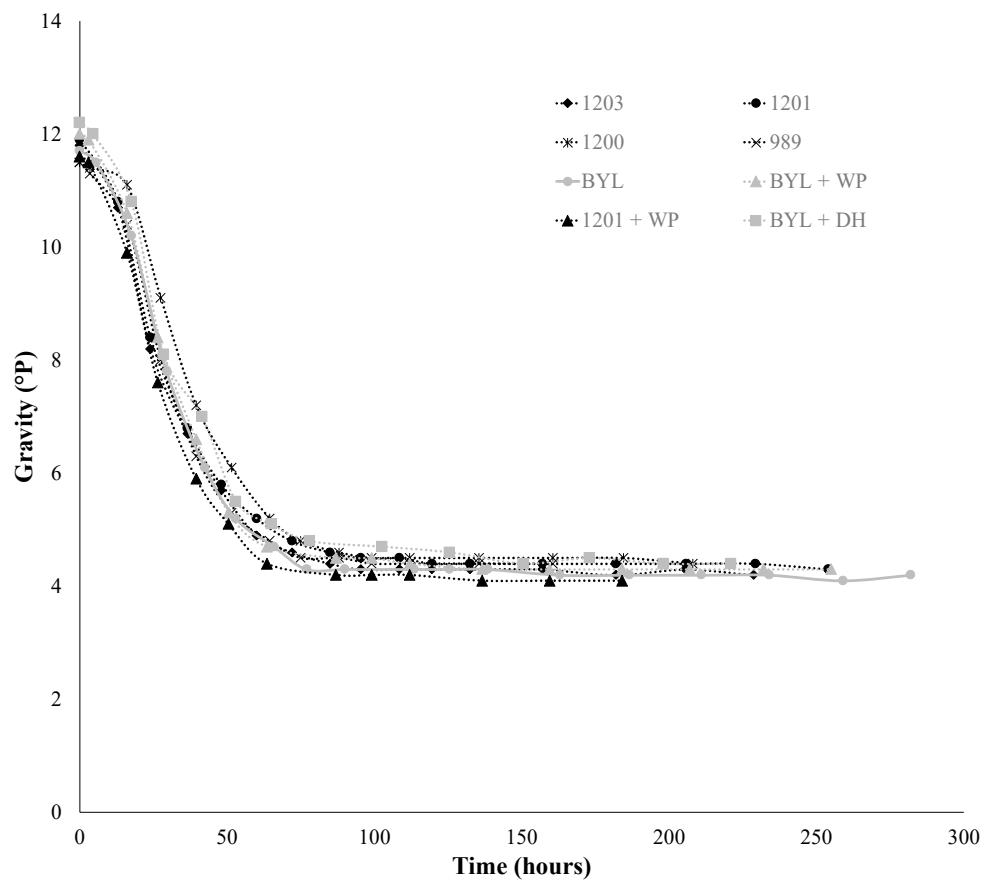

**Figure S1.** Fermentation performance data of all yeast strains.

**Table S1.** Check-All-That-Apply Attributes and Training Standards

| Attribute    | Standard                               | Source/Brand                              |
|--------------|----------------------------------------|-------------------------------------------|
| Fruity       | Fruit Cocktail                         | Del Monte®                                |
| Resinous     | Simcoe® Hop Oil                        | Hydro-distillation of Simcoe® Hop Pellets |
| Melon        | Fresh Cantaloupe                       | Market of Choice, Corvallis, OR           |
| Tropical     | POG juice (Pineapple, Orange, Guava)   | Meadow Gold®                              |
| Sweaty       | Block 15 Sticky Hands IPA              | Block 15 Brewing, Corvallis, OR           |
| Stone Fruit  | Canned Peaches                         | Dole®                                     |
| Guava        | Guava Juice                            | Kern's                                    |
| Passionfruit | Passionfruit Juice                     | Langer Juice                              |
| Mango        | Mango Juice                            | Kern's                                    |
| Pineapple    | Pineapple Juice                        | Langer Juice                              |
| Herbal       | Black Tea Bags                         | Lipton®                                   |
| Vegetal      | Canned Corn                            | Del Monte®                                |
| Grainy       | Ground Malt                            | 2-Row, Rahr, MN                           |
| Citrus       | Canned Grapfruit                       | Del Monte®                                |
| Floral       | Lavender Essential Oil                 | Now® essential oils                       |
| Nutty        | Mixed Nuts (peanuts, walnuts, almonds) | Planters                                  |
| Caramel      | Caramel Candy                          | Werthers Original                         |
| Grassy       | Hay                                    | NA                                        |
| Earthy       | -                                      | -                                         |

\*Dashes indicate lack of standard and verbalized discussion of attribute

**Table S2.** Frequency of the Aroma and Flavor Attributes Selected by the Panelists (N=18) during CATA Sensory Evaluation of Beer Samples.

| Scheme<br>1203. | Attributes     |           |                    |            |                |            |                |           |              |            |             |              |             |            |            |           |           |                |              |
|-----------------|----------------|-----------|--------------------|------------|----------------|------------|----------------|-----------|--------------|------------|-------------|--------------|-------------|------------|------------|-----------|-----------|----------------|--------------|
|                 | Tropi-<br>cal* | Guav<br>a | Passion-<br>fruit* | Swea<br>ty | Resin-<br>ous* | Fruit<br>y | Pine-<br>apple | Mang<br>o | Cit-<br>rus* | Grain<br>y | Herba<br>l* | Vege-<br>tal | Flo-<br>ral | Earth<br>y | Grass<br>y | Nutt<br>y | Melo<br>n | Stone<br>Fruit | Cara-<br>mel |
| 1203            | 14             | 7         | 8                  | 4          | 5              | 6          | 4              | 7         | 0            | 3          | 4           | 1            | 2           | 0          | 5          | 1         | 1         | 1              | 0            |
| 1201            | 15             | 6         | 6                  | 8          | 7              | 4          | 5              | 4         | 3            | 4          | 0           | 4            | 1           | 2          | 3          | 1         | 3         | 0              | 0            |
| 1200            | 16             | 9         | 10                 | 6          | 4              | 6          | 4              | 6         | 4            | 2          | 0           | 2            | 3           | 1          | 1          | 1         | 4         | 1              | 0            |
| 989             | 14             | 9         | 6                  | 5          | 4              | 8          | 9              | 4         | 3            | 3          | 2           | 1            | 3           | 3          | 0          | 1         | 3         | 0              | 1            |
| LA3             | 9              | 4         | 2                  | 5          | 5              | 7          | 2              | 3         | 2            | 5          | 4           | 6            | 1           | 6          | 4          | 2         | 1         | 2              | 1            |
| LA3 +<br>WP     | 11             | 4         | 1                  | 5          | 4              | 4          | 7              | 4         | 8            | 6          | 3           | 4            | 3           | 2          | 1          | 4         | 1         | 0              | 3            |

|                 |      |     |     |     |     |     |     |     |     |     |     |     |     |     |     |     |     |    |    |
|-----------------|------|-----|-----|-----|-----|-----|-----|-----|-----|-----|-----|-----|-----|-----|-----|-----|-----|----|----|
| 1201 + WP       | 17   | 6   | 11  | 4   | 3   | 6   | 4   | 7   | 5   | 4   | 1   | 2   | 3   | 1   | 2   | 2   | 0   | 0  | 2  |
| LA3 + DH        | 9    | 2   | 3   | 9   | 12  | 2   | 7   | 3   | 7   | 1   | 7   | 1   | 5   | 4   | 2   | 2   | 0   | 1  | 1  |
| <i>Total</i>    | 105  | 47  | 47  | 46  | 44  | 43  | 42  | 38  | 32  | 28  | 21  | 21  | 21  | 19  | 18  | 14  | 13  | 5  | 8  |
| <i>% of Max</i> | 100% | 45% | 45% | 44% | 42% | 41% | 40% | 36% | 30% | 27% | 20% | 20% | 20% | 18% | 17% | 13% | 12% | 5% | 8% |

\*Indicate a significant difference between samples based on the attribute, Cochran's Q test (*P* value < 0.05).
